# Supplementary material for: Clusterin expression can be modulated by changes in TCF1-mediated Wnt signaling
Source: PubMed Central journal article supplement (PMC1976611; doi:10.1186/1750-2187-2-6), 2007-07-16
Supplement: 1750-2187-2-6-S1.pdf [file 1750-2187-2-6-S1.pdf]

| Cell line | Observer | Vector        | # transfected | # CLU positive | % CLU positive |
|-----------|----------|---------------|---------------|----------------|----------------|
| LS174T    | CLA      | GFP-cyt-E-cad | 158           | 48             | 30             |
|           |          | GFP control   | 159           | 13             | 8              |
|           | TS       | GFP-cyt-E-cad | 157           | 47             | 30             |
|           |          | GFP control   | 156           | 21             | 13             |
| HCT116    | CLA      | GFP-cyt-E-cad | 151           | 67             | 44             |
|           |          | GFP control   | 150           | 11             | 7              |
|           | TS       | GFP-cyt-E-cad | 152           | 57             | 38             |
|           |          | GFP control   | 151           | 10             | 7              |
