# Supplementary material for: Clusterin expression can be modulated by changes in TCF1-mediated Wnt signaling
Source: PubMed Central journal article supplement (PMC1976611; doi:10.1186/1750-2187-2-6), 2007-07-16

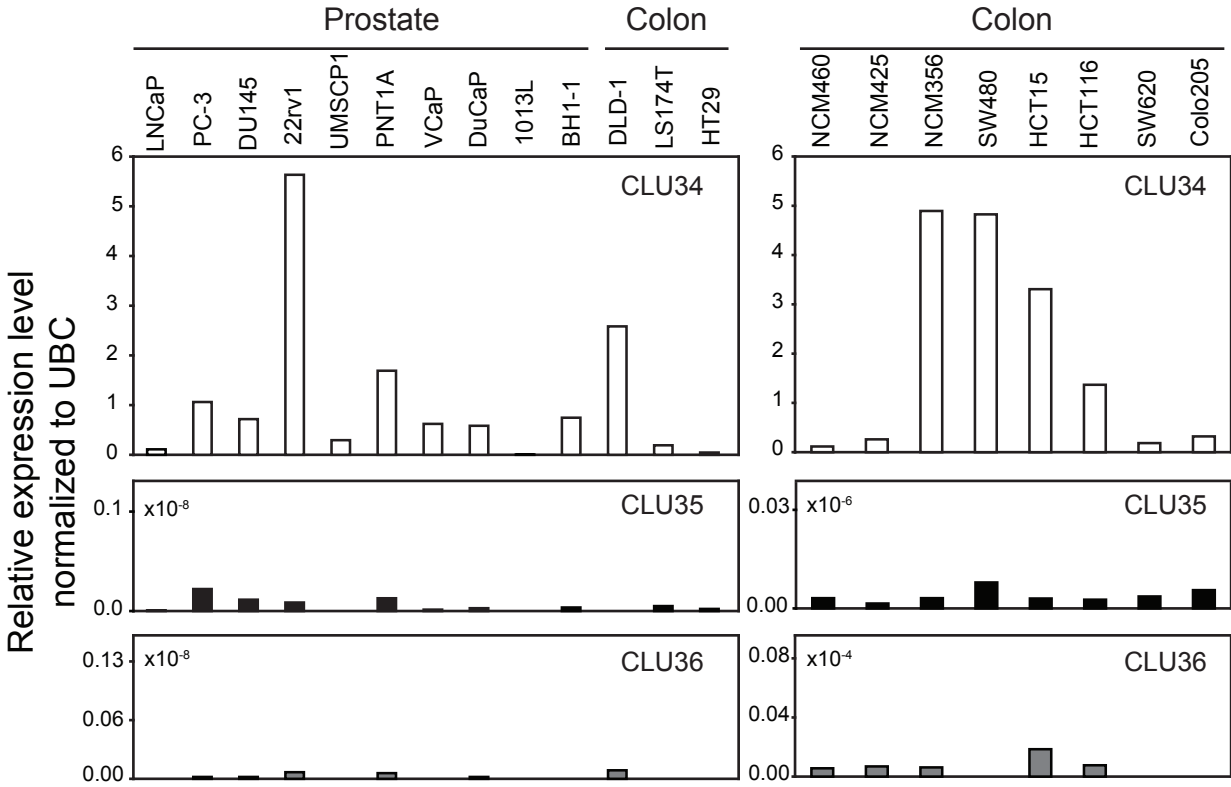

Supplement: 1750-2187-2-6-S2.pdf [file 1750-2187-2-6-S2.pdf]
